# Supplementary material for: Comparative evaluation of the sleep quality metrics between a cardboard bed and a camp cot: a randomized controlled crossover study
Source: PeerJ. 2024 May 24;12:e17392. doi: 10.7717/peerj.17392 (PMC11129694; doi:10.7717/peerj.17392)
Supplement: Supplemental Information 1 [file peerj-12-17392-s001.xlsx]

## Sheet: Sheet1
		Camp cot				Cardboard bed				Cohen's d		95% Confidential interval
Supine pressure		28.81	±	2.16		37.75	±	3.4		3.06		-10.18	-	-7.69
Lateral pressure		35.05	±	2		38.85	±	3.13		2.7		-5.2	-	-2.4
Supine contour area		73.93	±	9.03		53.94	±	8.35		8.75		17.95	-	23.11
Lateral contour area		59.56	±	5.74		46.69	±	5.31		5.56		11.15	-	14.58
