# Supplementary material for: Comparative evaluation of the sleep quality metrics between a cardboard bed and a camp cot: a randomized controlled crossover study
Source: PeerJ. 2024 May 24;12:e17392. doi: 10.7717/peerj.17392 (PMC11129694; doi:10.7717/peerj.17392)
Supplement: Supplemental Information 2 [file peerj-12-17392-s002.xlsx]

## Sheet: Sheet1
		Estimated mean				SD		df		Effect size (pseudo-R2)		AIC		BIC		95% Confidential interval
		Camp cot		Cardboard bed
Bedding Firmness		4.35		8.35		0.33		39.92		0.632025		136.47		141.22		-4.66	-	-3.34
Subjective comfort		4.7		7.55		0.38		18		0.478864		139.25		144		-3.64	-	-2.06
Cervical stiffness		2.5		4.7		0.49		18		0.1024		179.25		184		-3.22	-	-1.18
Lumbar stiffness		1.95		5.3		0.52		18		0.2601		176.57		181.32		-4.43	-	-2.27
Sleep satisfaction		3.75		5.7		0.44		27.46		0.322624		153.68		158.43		-2.85	-	-1.05
Sleepiness after awaking (KSS-J)		3.35		5.4		0.42		18		0.269361		155.86		160.62		-2.94	-	-1.16
Body movement		1.94		2.57		0.26		18		0.093636		128.36		133.11		-1.18	-	-0.08
Time in bed (TIB)		439.7		427.92		11.83		18		0.042025		394.24		398.99		-13.09	-	36.64
Total sleep time (TST)		395.41		399.25		10.75		18		0.017956		396.67		401.42		-26.42	-	18.73
Sleep latency (SL)		16.15		13.35		2.04		18		0.079524		297.05		301.8		-1.48	-	7.08
Waking after sleep onset(WASO)		23.75		19.7		5.48		26.75		0.013225		337		341.75		-7.2	-	15.3
Sleep efficiency (SE)		90.74		92.35		1.55		18		0.010816		247.33		252.09		-4.86	-	1.63
stage N1		8.23		8.32		0.7		18		0.229441		218.84		223.59		-1.56	-	1.39
stage N2		53.79		54.81		1.35		35.75		0.101761		246.71		251.46		-4.86	-	2.82
stage N3		18.16		16.8		1.35		18		0.469225		240.56		245.32		-1.47	-	4.19
stage REM		19.76		19.98		1.31		18		0.025281		234.04		238.79		-2.97	-	2.53
