# Supplementary material for: Comparative evaluation of the sleep quality metrics between a cardboard bed and a camp cot: a randomized controlled crossover study
Source: PeerJ. 2024 May 24;12:e17392. doi: 10.7717/peerj.17392 (PMC11129694; doi:10.7717/peerj.17392)
Supplement: Supplemental Information 4 — These data were utilized to compare body pressure distribution and sleep-related metrics when lying on two types of emergency beds. [file peerj-12-17392-s004.xlsx]

## Sheet: Sheet1
ID	Sequence	Age	Sex	BMI	Average sleep time (three nights before experiment)		Excessive daytime sleepiness		Subjective sleep satisfaction		KSS-J		Bedding Comfort		Bedding Firmness		Cervical strain		Lumbar strain		Body Pressure 【Supine】		Contact area [cm2]【Supine】		Body Pressure【Lateral】		Contact area [cm2]【Lateral】		Turning over/h		TIB (min)		TST [min]		WASO [min]		Sleep Efficiency		Sleep latency [min]		N1[%TST]		N2 [%TST]		N3 [%TST]		REM [%TST]
					Camp cot	Cardboard bed	Camp cot	Cardboard bed	Camp cot	Cardboard bed	Camp cot	Cardboard bed	Camp cot	Cardboard bed	Camp cot	Cardboard bed	Camp cot	Cardboard bed	Camp cot	Cardboard bed	Camp cot	Cardboard bed	Camp cot	Cardboard bed	Camp cot	Cardboard bed	Camp cot	Cardboard bed	Camp cot	Cardboard bed	Camp cot	Cardboard bed	Camp cot	Cardboard bed	Camp cot	Cardboard bed	Camp cot	Cardboard bed	Camp cot	Cardboard bed	Camp cot	Cardboard bed	Camp cot	Cardboard bed	Camp cot	Cardboard bed	Camp cot	Cardboard bed
A	A	44	M	24.9	6.66667	7	No	No	6	7	6	7	6	8	6	9	1	2	2	6	29	42	87.2667	59.7333	36.3333	41	75.1333	51.9867	6.33205	5.21092	387.5	296.5	351.5	260	30.5	30	90.5	91.7	6.5	3.5	29.4	23.1	45.4	54.4	4.1	0.4	21.1	22.1
B	B	45	M	29.9	7	6.33333	No	No	3	8	2	7	4	8	4	10	4	8	4	9	28.3333	42	71.8667	59.7333	33.6667	41	61.32	51.9867	3.08235	3.05511	403	398	369.5	368.6	8.5	19	91.8	93.4	18.5	3	8.1	8.7	66.5	62.7	19.9	13.5	5.3	14.4
C	B	32	F	19.3	6	7	No	No	5	6	3	6	6	8	1	9	2	2	2	6	26.6667	40	80.64	49.3733	36.3333	39.6667	53.0133	42.9333	1.13185	2.13051	330	413.5	303.917	402.017	11	16	94.9	94.8	10.5	6	2.6	2.4	57.6	62.9	14.2	10.9	25.5	23.6
D	A	37	M	20.7	7.33333	6.66667	No	No	1	4	3	7	3	5	4	8	0	2	0	4	26.6667	40	80.64	49.3733	36.3333	45	53.0133	41.3467	1.31281	1.84615	329.5	438.5	311.9	378.667	34	2.5	90.5	92.3	9.5	20	12.2	8.1	63.2	49.6	9.2	26.3	15.4	15.9
E	A	19	F	20.52	6.66667	6.33333	No	No	6	6	1	1	7	8	6	8	4	7	6	9	30.6667	39.6667	71.96	55.8133	36.3333	38.6667	61.32	47.2267	1.11836	1.30693	422.5	407.5	402.583	391	58.5	48	88.5	89	3	7.5	12.2	9.9	50.4	65.6	10.4	9	26.9	15.5
F	A	42	F	23	6.66667	6.33333	No	No	2	6	2	1	4	7	4	8	0	0	0	0	29	38.6667	67.76	46.3867	34.3333	37	56.4667	43.4933	1.9467	1.67742	417	440.5	400.433	414.5	15	19	94.9	94.2	7	8	7.7	10.2	55.2	50	11	11.6	26.1	28.2
G	B	39	F	21	7	6.66667	No	No	7	7	5	7	5	7	6	7	4	6	4	3	25.6667	31.6667	91.84	69.2533	37	34.3333	63.9333	56.4667	2.35023	5.81081	456.5	493	413.533	426.917	28.5	21	91.2	93.6	9.5	7.5	16.2	19.1	47.9	54.6	14.8	7.5	21.2	18.8
H	B	22	F	19.7	6.66667	7	No	No	1	7	2	7	3	10	4	8	5	8	0	6	28.6667	35	64.96	45.2667	34.3333	40.6667	56.9333	41.72	2.06897	1.50313	292.5	427	270	371.25	31	34	90.5	90.2	13	13	18.8	14.1	52.9	56.7	9.3	9.5	19	19.7
I	B	24	F	19.3	7	7.33333	No	No	4	6	6	7	5	8	4	8	1	4	1	3	26.6667	32.6667	73.7333	51.7067	37	40.6667	54.7867	43.0267	1.19791	3.29755	535	492	475	457	4.5	5.5	96.2	95.3	12.5	16	2.1	3	57.3	53.8	20.2	22	20.3	21.1
J	A	20	F	19.2	7.33333	7.33333	No	No	4	7	3	7	5	8	6	9	4	8	3	7	27.9259	37.963	76.7407	54.0711	33.3333	36	64.2133	49.6533	1.77273	1.66474	484.5	494	449.5	481.5	17.5	18	92.2	91.9	17	17	6.5	7.7	54.4	60.6	11.1	10.4	28	21.3
K	B	20	F	23.7	7	7	No	No	4	7	3	5	4	9	3	9	2	6	1	3	29.6667	36	82.6933	69.9067	36.6667	41.3333	70.0933	53.5733	2.67658	4.04343	430.5	481	409.5	439.1	11.7	15.5	84.4	92	26	16.5	6.5	5.7	56.3	45.6	27.9	29.6	9.2	19
L	A	19	F	18.8	7.33333	8	No	No	2	6	3	7	3	8	4	10	2	8	1	7	32.6667	42.3333	62.2533	44.0533	33.3333	41.6667	52.92	36.8667	2.0119	3.41168	464.5	491	438	470.1	6.5	42	96.3	86.1	9	19	1.6	5.9	57.1	48.1	31.7	23.4	9.5	22.4
M	A	20	F	18.1	7.33333	7.33333	No	No	4	5	3	3	3	6	3	7	0	0	0	0	30	39.3333	66.8267	48.8133	33.3333	36.3333	58.9867	43.5867	1.75396	2.17687	432.5	395	396	385.667	11.5	11	95.2	94	8	15.5	5.9	6.2	50.6	62.6	21.7	13.6	21.7	17.6
N	B	32	F	18.3	7.33333	7.33333	No	No	4	8	4	7	5	9	4	9	6	9	2	9	27	34.6667	68.5067	54.88	31.6667	33	57.3067	49.3733	0.974619	1.09109	443	416	415.5	402.7	23	41.5	86.3	86.6	4.5	16	5.6	8.6	59.3	52.3	21.5	22.9	13.4	16
O	A	19	F	20.2	7	6.33333	No	No	4	4	3	5	5	5	5	7	6	3	5	7	29	34.6667	68.6933	47.6933	32.6667	38	58.6133	44.24	1.21827	0.846774	463.5	452.5	420.5	443.017	24.5	11	92.8	97.1	11	3.5	5.6	2.9	50.4	44.3	20.5	26.8	23.5	25.9
P	B	19	F	21.875	6.66667	7.66667	No	No	6	3	3	3	7	8	5	7	0	0	0	2	33	41	71.4933	51.24	39.6667	43.3333	56.7467	45.5467	1.11778	1.69492	478	429.5	432	414.183	30.5	19.5	90.9	94.9	13.5	6	5.7	3.1	48.6	51.6	23.2	22.8	22.4	22.5
Q	B	19	F	20.6	7.33333	8	No	No	3	4	3	5	6	8	5	8	0	3	0	2	32.3333	40	65.0533	52.22	33	39	60.1067	47.2267	1.28817	2.48396	450	419	433.783	404.15	6	12	97.2	96.1	5	4.5	4.3	3.8	47.6	51.5	29	25	18.9	19.6
R	A	19	F	20.6	7	6.33333	No	No	3	7	3	7	6	8	7	9	4	9	4	8	28.6667	37.6667	66.64	42.84	34.3333	39	55.8133	43.5867	1.71989	4.45803	454.5	430.5	433.383	419.833	4.5	12	97.7	96.2	6	4.5	4.6	11.5	43.9	53.8	24.7	15.8	26.6	18.7
S	B	22	F	20.5	6.66667	7.33333	No	No	2	2	6	6	5	7	4	9	1	2	1	8	29	38	67.1067	46.2933	34.3333	37	56.4667	43.4933	1.569	1.53014	437.5	374.5	405.5	287.5	8.5	4.5	96.1	97.3	8	7	1.9	2.6	48.7	53.1	26.5	22.2	22.8	21.9
T	A	22	F	21	7	7	No	No	4	4	3	3	2	6	2	8	4	7	3	7	25.6667	31.6667	91.84	69.2533	37	44.3333	63.9333	56.4667	2.07723	2.22738	429.5	425	397.5	346	3.5	12	76.6	80.3	8.5	7.3	7.1	9.7	62.4	62.3	12.2	12.7	18.3	15.3
